# Supplementary material for: Harnessing the potential: advances in cyanobacterial natural product research and biotechnology
Source: Royal Society of Chemistry journal article supplement (doi:10.1039/d3np00045a), 2023-12-13
Supplement: d3np00045a1.pdf [file d3np00045a1.pdf]

Supplemental Information to

## Exploiting the natural product potential of cyanobacteria: a microbiologist's perspective

Martin Baunach, Arthur Guljamow, Maria Miguel Gordo and Elke Dittmann

### CyanoMetDB

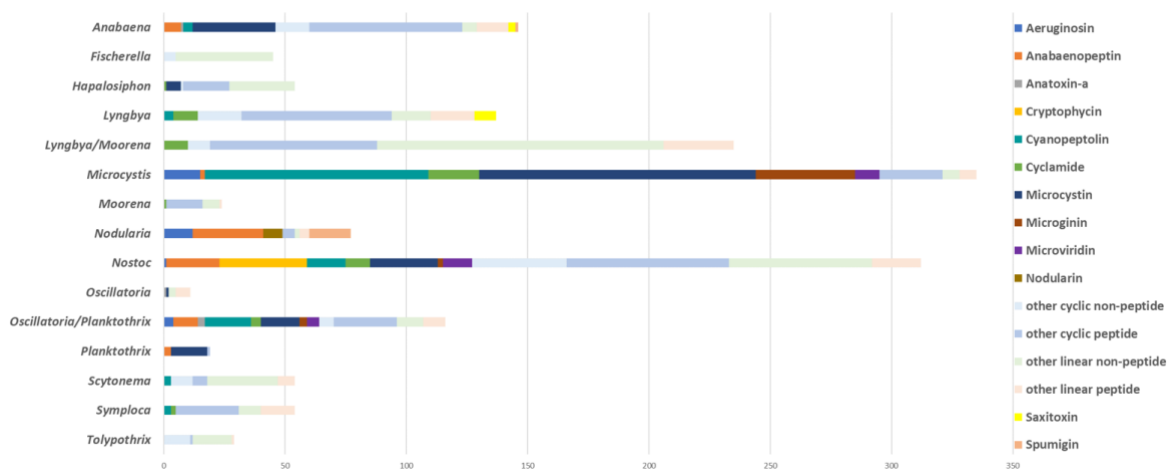

**Figure S1.** Distribution and chemical classification of cyanobacterial chemical entities in the fifteen most prolific genera according to CyanoMetDB. Please note that taxonomic classification has changed for some genera following taxon refinement by molecular characterization. Microcystins, cyanopeptolins and anabaenopeptins are the families with most analogues among different genera. Data obtained and estimated from <https://zenodo.org/record/7922070>.
